# Supplementary material for: Pathway Activation Analysis for Pan-Cancer Personalized Characterization Based on Riemannian Manifold
Source: Int J Mol Sci. 2024 Apr 17;25(8):4411. doi: 10.3390/ijms25084411 (PMC11050713; doi:10.3390/ijms25084411)
Supplement: Supplementary file 1 [file ijms-25-04411-s001.zip › Supplementary Table S1_PrognosticBiomarkerPathways.xlsx]

## Sheet: BLCA
Pathway name	Pvalue
Glycolysis / Gluconeogenesis	0.0106529
D-Glutamine and D-glutamate metabolism	0.0391168
Endocrine resistance	0.0255342
IL-17 signaling pathway	0.00139058
B cell receptor signaling pathway	0.0361315
GABAergic synapse	0.0489527
Taste transduction	0.00191805
Proximal tubule bicarbonate reclamation	0.00205558
Bile secretion	0.0132284
Staphylococcus aureus infection	0.0214892
Hepatitis B	0.00316355
HALLMARK_TNFA_SIGNALING_VIA_NFKB	0.00129463
HALLMARK_MYC_TARGETS_V1	1.82119e-05
HALLMARK_MYC_TARGETS_V2	0.0156792
HALLMARK_EPITHELIAL_MESENCHYMAL_TRANSITION	0.0270964

## Sheet: BRCA
Pathway name	Pvalue
Fructose and mannose metabolism	5.03726e-07
Primary bile acid biosynthesis	0.0471156
Phosphonate and phosphinate metabolism	0.0462613
Glycosylphosphatidylinositol (GPI)-anchor biosynthesis	1.77644e-05
cAMP signaling pathway	0.0133438
PI3K-Akt signaling pathway	0.0119678
VEGF signaling pathway	1.15988e-05
Antigen processing and presentation	0.000130283
Taste transduction	0.0339757
Ovarian steroidogenesis	2.92681e-05
Melanogenesis	3.9088e-06
Carbohydrate digestion and absorption	0.0276402
Epithelial cell signaling in Helicobacter pylori infection	0.0323392
Non-small cell lung cancer	1.15988e-05
HALLMARK_MTORC1_SIGNALING	0.00793086
HALLMARK_EPITHELIAL_MESENCHYMAL_TRANSITION	0.0472862

## Sheet: COAD
Pathway name	Pvalue
Histidine metabolism	0.00236623
Glycosaminoglycan biosynthesis - chondroitin sulfate / dermatan sulfate	0.025294
Antifolate resistance	0.00670053
mRNA surveillance pathway	0.0487654
Phospholipase D signaling pathway	0.0311447
Longevity regulating pathway - multiple species	0.0324975
Focal adhesion	0.00834907
C-type lectin receptor signaling pathway	0.0458833
Th1 and Th2 cell differentiation	0.0158565
Taste transduction	0.0186751
Thyroid hormone signaling pathway	0.00871625
Viral myocarditis	1.84062e-48
HALLMARK_NOTCH_SIGNALING	0.00544732
HALLMARK_PROTEIN_SECRETION	0.0341574

## Sheet: HNSC
Pathway name	Pvalue
Glyoxylate and dicarboxylate metabolism	0.0457204
Folate biosynthesis	2.46123e-07
Cardiac muscle contraction	0.0154666
NOD-like receptor signaling pathway	0.0426732
Taste transduction	0.00631789
Phototransduction	0.0226095
Oxytocin signaling pathway	0.0403212
Bile secretion	0.0366319
Pancreatic cancer	0.0441601
Gastric cancer	0.0252662
Inflammatory bowel disease	0.0326709
HALLMARK_CHOLESTEROL_HOMEOSTASIS	0.023558
HALLMARK_PI3K_AKT_MTOR_SIGNALING	0.00573631
HALLMARK_UV_RESPONSE_UP	0.000344338

## Sheet: KICH
Pathway name	Pvalue
Fructose and mannose metabolism	0.000605502
C-type lectin receptor signaling pathway	0.00274196
Cortisol synthesis and secretion	0.00335752
Legionellosis	2.79058e-07
Autoimmune thyroid disease	0.000451899
Inflammatory bowel disease	0.0473231
Allograft rejection	0.000441616

## Sheet: KIRC
Pathway name	Pvalue
Purine metabolism	0.043602
Caffeine metabolism	0.0322687
Phenylalanine, tyrosine and tryptophan biosynthesis	0.0119768
Amino sugar and nucleotide sugar metabolism	0.000102724
Endocrine resistance	0.00195811
cGMP-PKG signaling pathway	0.0225145
Sulfur relay system	0.0394859
Axon guidance	0.0389013
Cholinergic synapse	0.0208978
GnRH signaling pathway	0.0291064
Cushing syndrome	0.0395002
Gastric cancer	0.0114588
HALLMARK_PROTEIN_SECRETION	0.0474135
HALLMARK_ALLOGRAFT_REJECTION	0.00456737

## Sheet: KIRP
Pathway name	Pvalue
Tryptophan metabolism	0.00152546
PPAR signaling pathway	0.0182164
Antigen processing and presentation	0.00162719
Natural killer cell mediated cytotoxicity	0.00404144
Dopaminergic synapse	2.19524e-12
Pertussis	0.0051103
Staphylococcus aureus infection	0.0177766
HALLMARK_APICAL_JUNCTION	0.0438248

## Sheet: LGG
Pathway name	Pvalue
Taurine and hypotaurine metabolism	0.0243921
Glycerophospholipid metabolism	0.0092035
Linoleic acid metabolism	0.00371437
Rap1 signaling pathway	0.0353497
TGF-beta signaling pathway	0.00513914
Natural killer cell mediated cytotoxicity	0.0134073
Regulation of lipolysis in adipocytes	0.00278882
Amoebiasis	0.0496526
Thyroid cancer	0.00705363
HALLMARK_IL6_JAK_STAT3_SIGNALING	0.0383711
HALLMARK_APOPTOSIS	0.0202841
HALLMARK_EPITHELIAL_MESENCHYMAL_TRANSITION	0.0394901
HALLMARK_UV_RESPONSE_UP	0.0318394
HALLMARK_COAGULATION	0.0181743

## Sheet: LIHC
Pathway name	Pvalue
Synthesis and degradation of ketone bodies	7.07589e-11
Purine metabolism	0.0251715
Taurine and hypotaurine metabolism	0.033237
Phosphonate and phosphinate metabolism	0.00152736
Selenocompound metabolism	0.0111036
EGFR tyrosine kinase inhibitor resistance	0.0268046
Ras signaling pathway	0.0119949
Phospholipase D signaling pathway	0.0472815
Mitophagy	8.62963e-05
Peroxisome	0.0333042
Longevity regulating pathway	0.0274555
Hippo signaling pathway	0.0339763
Toll-like receptor signaling pathway	0.031883
Natural killer cell mediated cytotoxicity	0.0189093
Insulin resistance	0.0260705
Proteoglycans in cancer	0.00477638
Melanoma	0.048618
Graft-versus-host disease	0.00852866
HALLMARK_TGF_BETA_SIGNALING	0.0417425
HALLMARK_DNA_REPAIR	0.00249449
HALLMARK_PROTEIN_SECRETION	0.0111036
HALLMARK_INTERFERON_GAMMA_RESPONSE	0.0276503
HALLMARK_INFLAMMATORY_RESPONSE	0.00893193

## Sheet: LUAD
Pathway name	Pvalue
Riboflavin metabolism	4.25538e-19
AMPK signaling pathway	0.0129976
Cell adhesion molecules	0.0108043
Human papillomavirus infection	0.00383681
Choline metabolism in cancer	0.00410574
Asthma	0.00426525
HALLMARK_INTERFERON_ALPHA_RESPONSE	0.0423876
HALLMARK_E2F_TARGETS	0.0228363
HALLMARK_UV_RESPONSE_DN	0.0334041

[truncated: 6 more sheets: LUSC, OV, PRAD, STAD, THCA, UCEC]
